# Supplementary material
Source: PubMed Central journal article supplement (PMC5947995)
Supplement: NIHMS964469-supplement-supplement_1.pdf [file NIHMS964469-supplement-supplement_1.pdf]

# Supplemental Figure 1

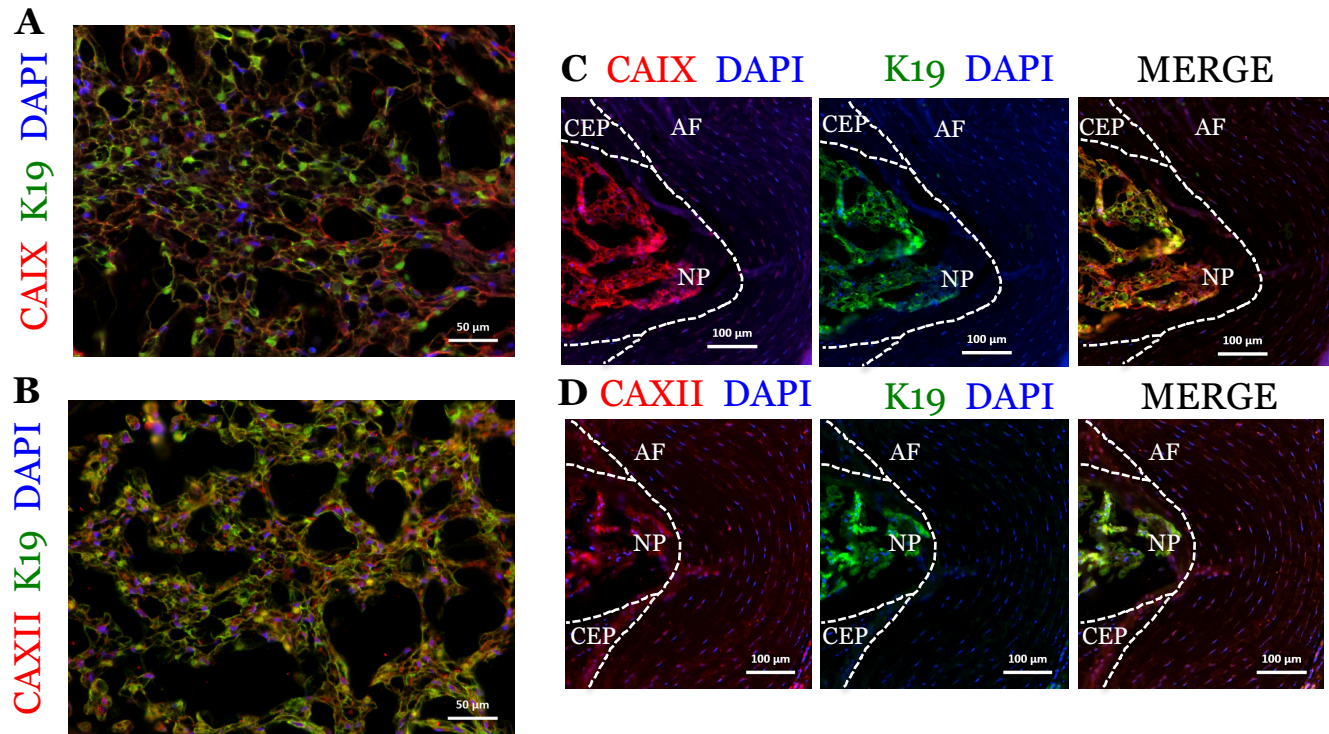

**Figure S1. Expression of select hypoxia-inducible CA isoforms in the intervertebral disc.** A, B) High magnification merged images of K19 and CAIX (A) and CAXII (B) in tail discs showing cellular localization. C, D) Immunofluorescence localization of CAIX (C), CAXII (D), and K19 in the NP and AF of tail discs. Scale bar in A and B is 100  $\mu$ m and in C and D is 100  $\mu$ m. 3 independent biological replicates were analyzed for each experiment.

**Table S1:** Primer sequences used for Chromatin Immunoprecipitations

| <b>Gene Name</b> | <b>Primer Location</b> |            | <b>Primer Sequence</b>     |                            |
|------------------|------------------------|------------|----------------------------|----------------------------|
|                  | <b>Start</b>           | <b>End</b> | <b>Forward</b>             | <b>Reverse</b>             |
| Car9 R1          | +33                    | -72        | 5'-acaaaagggcactgtgagtc-3' | 5'-tcccaggacacggtgt-3'     |
| Car9 R2          | -529                   | -743       | 5'-tcacctggattcagtctcc-3'  | 5'-ctgccaaaggacaaccactt-3' |
| Car9 R3          | -1282                  | -1395      | 5'-tgtgaaatccagggtcacag-3' | 5'-acacacgcacacacaaagta-3' |
| Car12 R1         | -24                    | -172       | 5'-gagtcgccacataaaaagca-3' | 5'- ccgctggctctaagctgt-3'  |
| Car12 R2         | -818                   | -964       | 5'-cagagcaggaggccaataag-3' | 5'-tttaccctgtggctagtg-3'   |
| Car12 R3         | -1742                  | -1941      | 5'-aaccaccacaccaagtffc-3'  | 5'-aaggttcctgaagatggaga-3' |
